# Supplementary material for: Diagnostic Value of Pelvic and Transperineal Ultrasound in Girls with Central Precocious Puberty
Source: Research Square preprint supplement (doi:10.21203/rs.3.rs-8220014/v1), 2026-02-03
Supplement: Supplementary file 1 [file 026d953f11f32375828375d9.docx]

جدول 1. اطلاعات فردی مربوط به گروه مورد و شاهد

| متغیر |  | گروه مورد  فروانی (%) | گروه شاهد  فراوانی (%) | p-value |
| --- | --- | --- | --- | --- |
| تحصیلات مادر | دیپلم و کمتر | **(34.4%) 11** | **(34.4%) 11** | **1** |
| تحصیلات دانشگاهی | **(65.6%) 21** | **(65.6%) 21** |
| تحصیلات پدر | دیپلم و کمتر | **(53.1%) 17** | **(34.4%) 11** | **0.13** |
| تحصیلات دانشگاهی | **(46.9%) 15** | **(65.6%) 21** |
| شغل مادر | خانه دار | **(78.1%) 25** | **(65.6%) 21** | **0.27** |
| شاغل | **(21.9%) 7** | **(34.4%) 11** |
| شغل پدر | آزاد | **(46.9%) 15** | **(43.8%) 14** | **0.8** |
| کارمند | **(53.1%) 17** | **(563.3%) 18** |
| مصرف لبنیات | کمتر از 3 واحد در روز | **(90.6%) 29** | **(65.6%) 21** | **0.016** |
| بیش از 3 واحد در روز | **(9.4%) 3** | **(34.4%) 11** |
| مصرف سویا | کمتر از 500گرم | **(93.8%) 30** | **(93.8%) 30** | **0.69** |
| بیش از 500گرم | **(6.3%) 2** | **(6.3%) 2** |
| مصرف بادام زمینی | کمتر از 500گرم | **(93.8%) 30** | **(78.1%) 25** | **0.74** |
| بیش از 500گرم | **(6.3%) 2** | **(21.9%) 7** |
| تولد زودرس | بلی | **(6.3%) 2** | **(6.3%) 2** | **0.69** |
| خیر | **(93.8%) 30** | **(93.8%) 30** |
| نوع زایمان | سزارین | **(31.3%) 10** | **(43.8%) 14** | **0.3** |
| طبیعی | **(68.8%) 22** | **(56.3%) 18** |
| مشاهده فیلم نامتناسب با سن | بلی | **(3.1%) 1** | **(0%) 0** | **0.5** |
| خیر | **(96.9%) 31** | **(100%) 32** |
| سابقه بیماری خاص در گذشته | بلی | **(0%) 0** | **(3.1%) 1** | **0.5** |
| خیر | **(100%) 32** | **(96.9%) 31** |

جدول 2. اطلاعات کمی مربوط به گروه مورد و شاهد

| متغیر | گروه مورد  میانگین (انحراف معیار) | گروه شاهد  میانگین (انحراف معیار) | p-value |
| --- | --- | --- | --- |
| سن | **(0.82) 7.17** | **(0.86) 6.86** | **0.12** |
| تعداد بچه در خانواده | **(0.56) 2** | **(0.43) 1.94** | **0.63** |
| رتبه تولد | **(0.62)1.53** | **(0.56)1.5** | **0.9** |
| سن بلوغ مادر | **(1.21)12.75** | **(1.07)12.63** | **0.86** |
| وزن تولد | **(362.28)3244.7** | **(273.06)3290.7** | **0.94** |
| قد تولد | **(1.59)50.81** | **(1.8)51.27** | **0.31** |
| دورسر تولد | **(0.81)34.86** | **(0.77)34.94** | **0.79** |
| وزن کنونی | **(6.6)25.83** | **(6.6)24.71** | **0.33** |
| قد کنونی | **(10.93)125.3** | **(7.74)124.67** | **0.51** |
| BMI | **(2.67)16.26** | **(3.58)15.87** | **0.16** |
| قد پدر | **(5.78)173.69** | **(7.27)176.06** | **0.94** |
| قد مادر | **(5.43)158.41** | **(6.08)161.06** | **0.56** |

جدول3اطلاعات مربوط به معیار های سونوگرافی در دو گروه مورد و شاهد

| متغیر | گروه مورد  میانگین (انحراف معیار) | گروه شاهد  میانگین (انحراف معیار) | p-value |
| --- | --- | --- | --- |
| طول رحم | **(8.77) 31.46** | **(2.96) 26.28** | **0.001** |
| ارتفاع رحم | **(4.94) 7.6** | **(1.92) 5.13** | **0.003** |
| عرض رحم | **(6.7)11.44** | **(3.05)8.1** | **0.004** |
| حجم رحم | **(8.31)2.93** | **(0.59)0.71** | **0.01** |
| طول تخمدان راست | **(5.44)24.28** | **(5.05)20.06** | **0.03** |
| ارتفاع تخمدان راست | **(2.97)10.25** | **(2.53)8.29** | **0** |
| عرض تخمدان راست | **(3.2)13.22** | **(0.77)34.94** | **0.002** |
| طول تخمدان چپ | **(5.05)23.37** | **(4.83)20.03** | **0.012** |
| ارتفاع تخمدان چپ | **(3.52)10.53** | **(1.88)8.32** | **0.003** |
| عرض تخمدان چپ | **(3.46)11.92** | **(3.09)10.57** | **0.041** |
| حجم تخمدان چپ | **(1.6)2.01** | **(0.88)1.15** | **0** |
| ضخامت اندومتر | **(1.98)0.81** | **(0.25)0.06** | **0.001** |
| طول سرویکس | **(3.08)14.31** | **(3.04)14.53** | **0.823** |
| طول جسم رحم | **(8.38)16.44** | **(2.92)12.31** | **0.004** |
| نسبت طول جسم رحم به طول سرویکس | **(0.62)1.19** | **(0.33)0.89** | **0.031** |
| طول قدامی خلفی  سرویکس | **(2.82)6.9** | **(1.05)5.68** | **0.003** |
| ضخامت مخاط واژینال | **(0.32)0.89** | **(0.26)0.68** | **0.006** |
| ضخامت عضله جدار واژن | **(0.4)1.16** | **(0.34)1.1** | **0.647** |
| نسبت ضخامت مخاط واژینال به ضخامت عضله جدار واژن | **(0.30)0.81** | **(0.25)0.64** | **0.317** |

جدول5نتایج برگرفته شده از منحنی راک

| متغیر | سطح زیر منحنی | مقدار اندازه گیری شده | کران پایین | کران بالا | حساسیت | اختصاصیت |
| --- | --- | --- | --- | --- | --- | --- |
| طول رحم | 0.747 | 26.5  27.5  28.5 | 0.626 | 0.867 | 69% | 69% |
| ارتفاع رحم | 0.713 | 5.15  5.35  5.55 | 0.586 | 0.840 | 65% | 65% |
| عرض رحم | 0.709 | 7.9  8.5 | 0.579 | 0.840 | 65% | 75% |
| حجم رحم | 0.734 | 0.60  0.63  0.67 | 0.608 | 0.859 | 71% | 71% |
| طول تخمدان راست | 0.712 | 20.5  21.5  22.5 | 0.585 | 0.839 | 62% | 65% |
| ارتفاع تخمدان راست | 0.702 | 8.5  9.25 | 0.572 | 0.832 | 68% | 62% |
| عرض تخمدان راست | 0.724 | 11.5  12.5 | 0.599 | 0.848 | 65% | 62% |
| حجم تخمدان راست | 0.723 | 1.09  1.15  1.22 | 0.599 | 0.848 | 62% | 65% |
| طول تخمدان چپ | 0.708 | 19.5  20.5 | 0.552 | 0.813 | 59% | 62% |
|  |  |  |  |
| ارتفاع تخمدان چپ | 0.712 | 8.25  8.75 | 0.587 | 0.837 | 65% | 59% |
| عرض تخمدان چپ | 0.648 | 10.5  11.5 | 0.512 | 0.784 | 53% | 68% |
| حجم تخمدان چپ | 0.708 | 1.06  1.09  1.15 | 0.582 | 0.835 | 65% | 65% |
| ضخامت اندومتر | 0.676 | 0.25  0.65 | 0.542 | 0.809 | 40% | 93% |
| طول سرویکس | 0.484 | 13.5  14.5 | 0.340 | 0.628 | 46% | 50% |
| طول جسم رحم | 0.707 | 12.5  13.5 | 0.575 | 0.838 | 68% | 65% |
| طول قدامی خلفی سرویکس | 0.716 | 5.85  5.95 | 0.589 | 0.844 | 71% | 62% |
| ضخامت مخاط واژینال | 0.697 | 0.75  0.79 | 0.568 | 0.827 | 62% | 56% |
| ضخامت میومتر | 0.533 | 1.02  1.05  1.08 | 0.390 | 0.676 | 53% | 50% |
| نسبت ضخامت مخاط واژینال به ضخامت عضله جدار واژن | 0.701 | 0.64 | 0.56 | 0.83 | 68% | 68% |


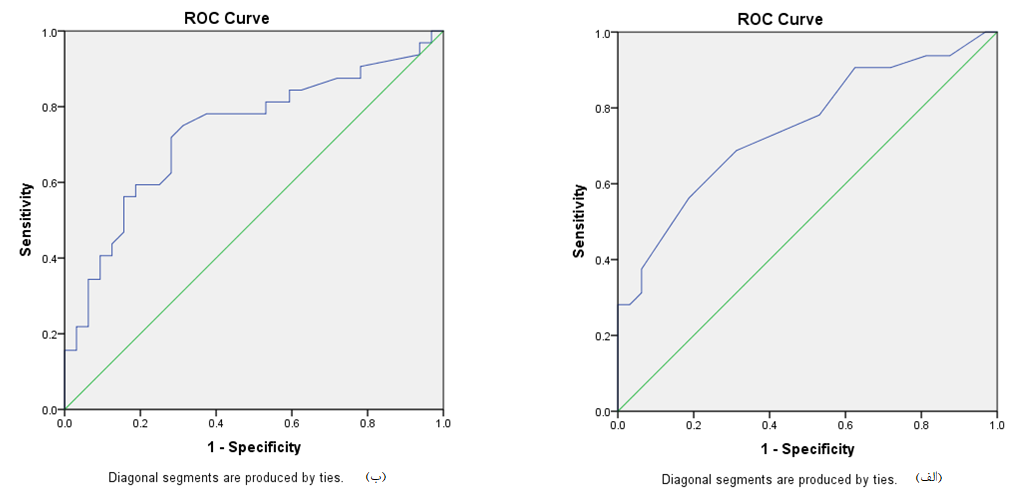


شکل 1. الف) منحنی راک مربوط به معیار طول رحم ب) منحنی راک مربوط به معبار حجم رحم
